# Supplementary material
Source: PubMed Central journal article supplement (PMC2665996)
Supplement: NIHMS62036-supplement-si20070125_012.pdf [file NIHMS62036-supplement-si20070125_012.pdf]

## Supporting Information

### Preparation and Characterization of Cross-linked Phospholipid Bilayer Capillary Coatings for Protein Separations

Elisabeth Mansfield, Eric E. Ross and Craig A. Aspinwall\*  
Department of Chemistry; University of Arizona; Tucson, AZ 85721

\* Author to whom correspondence should be addressed: [aspinwal@email.arizona.edu](mailto:aspinwal@email.arizona.edu);

520-621-6338 (phone)

520-621-8407 (fax)

Migration time reproducibility was measured on day 1 and day 10 in freshly cut and treated (see manuscript for description) bare capillaries. Additionally, the same protein mixture was used to assess migration time reproducibility in poly(bis-SorbPC) coated capillaries on day 1 and day 10. Following experiments on day 1, poly(bis-SorbPC) coated capillaries were rinsed with water and stored dry until use on day 10. As seen in Figure S-1, migration time reproducibility is enhanced for most analytes compared to bare capillaries. Additionally, all peaks in the protein mixture that were observed on day 1 were also observed on day 10 with poly(bis-SorbPC) coated capillaries, whereas some peaks are not observed for bare capillaries, supporting the enhanced protein detection capabilities of the polymer coated capillaries.

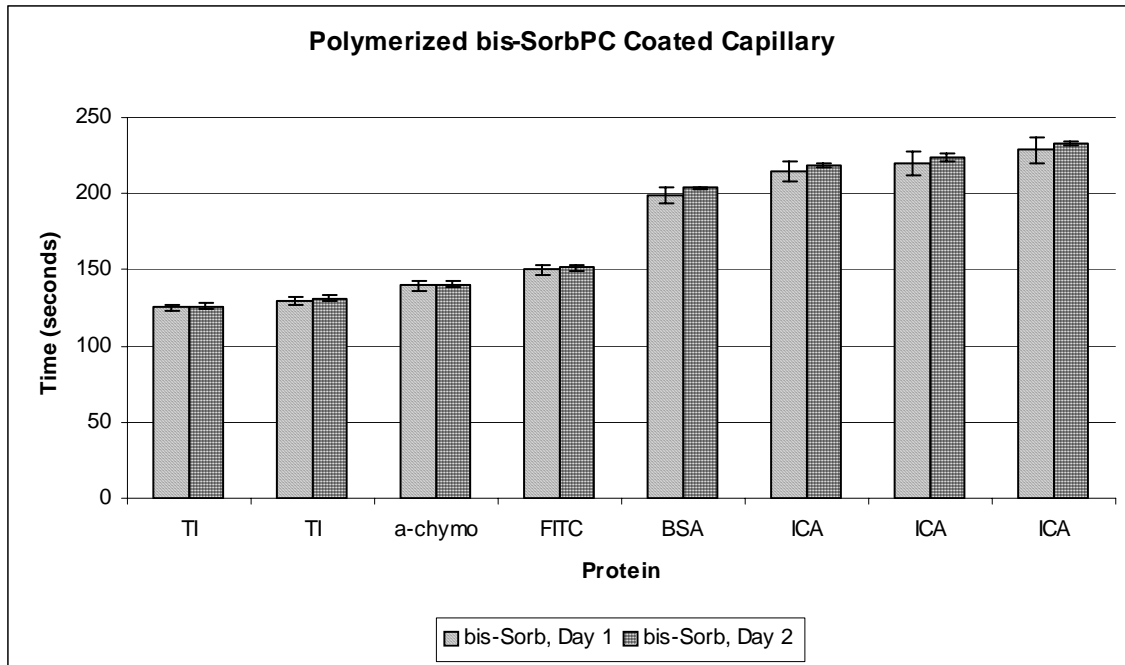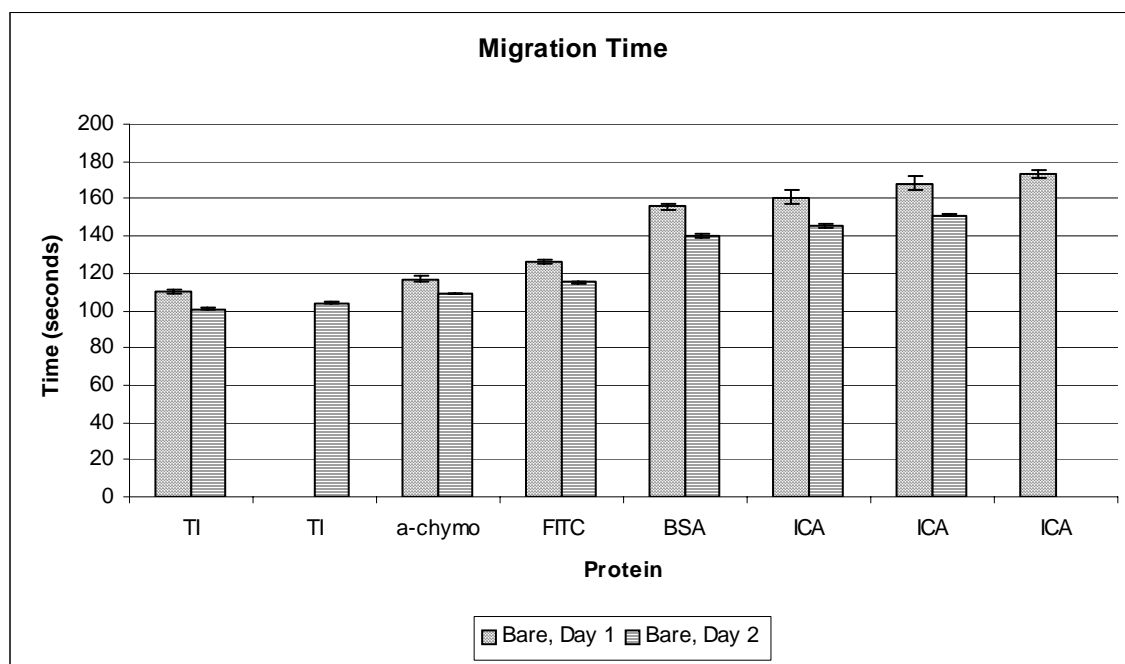

Figure S-1 – Migration time reproducibility in bare and poly(bis-SorbPC) coated capillaries.
